# Supplementary material
Source: PubMed Central journal article supplement (PMC4098792)

## Supplemental Figure S1 related to Figure 1

Papa et al.

A

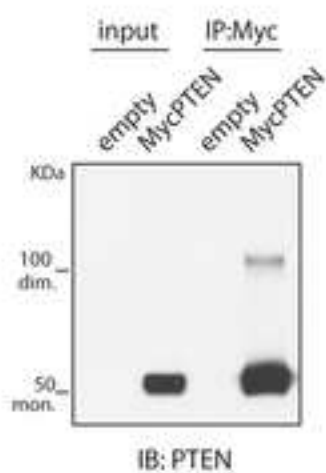

B

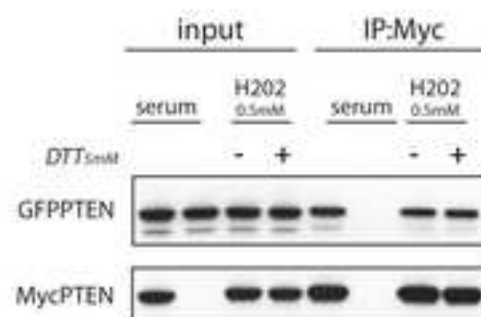

C

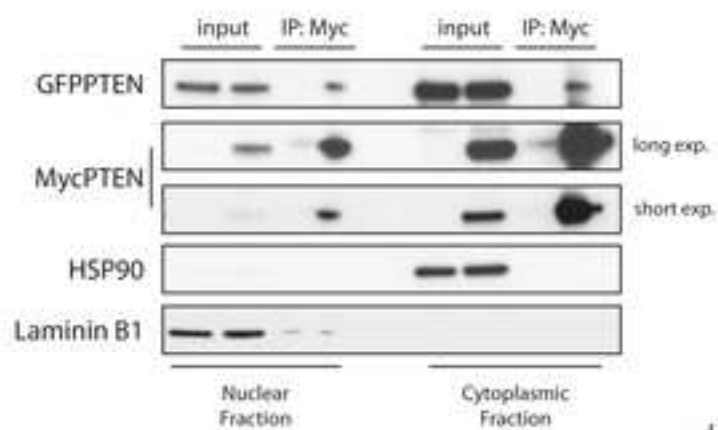

D

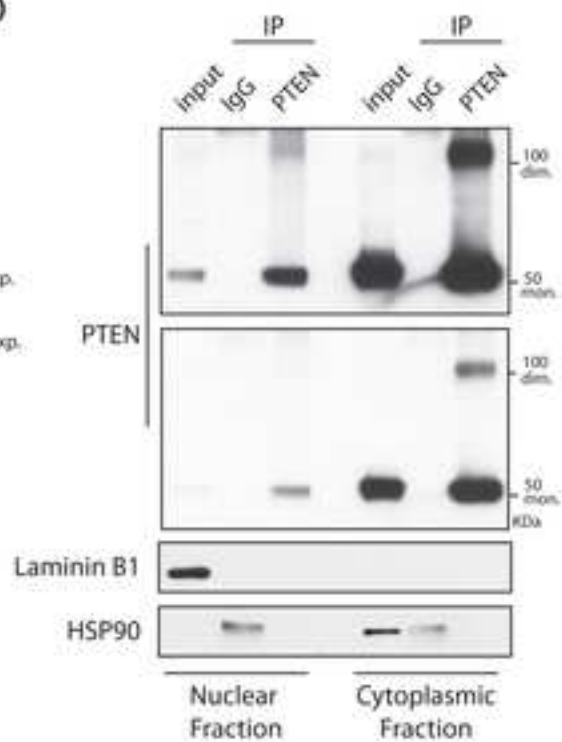

## Supplemental Figure S2 related to Figure 2

Papa et al.

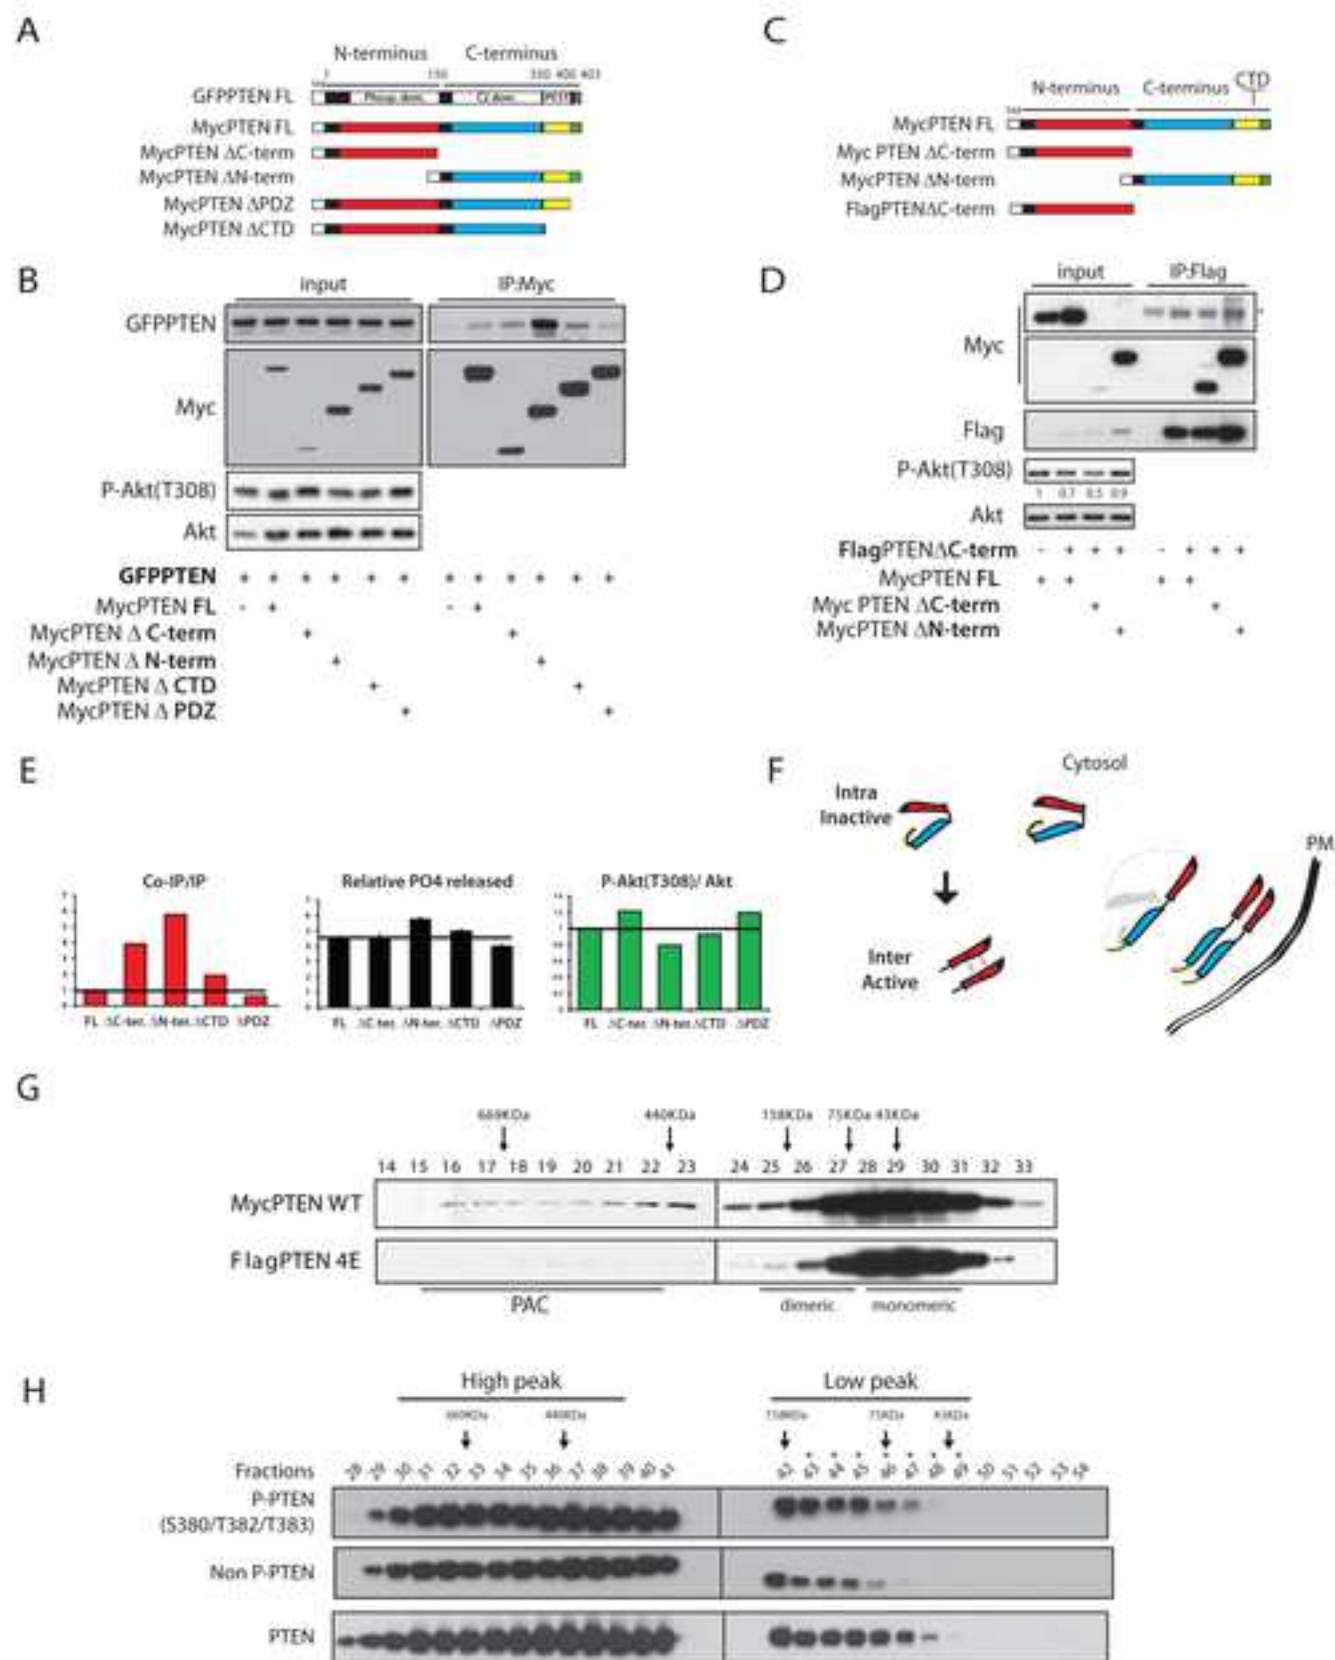

## Supplemental Figure S3 related to Figure 3

Papa et al.

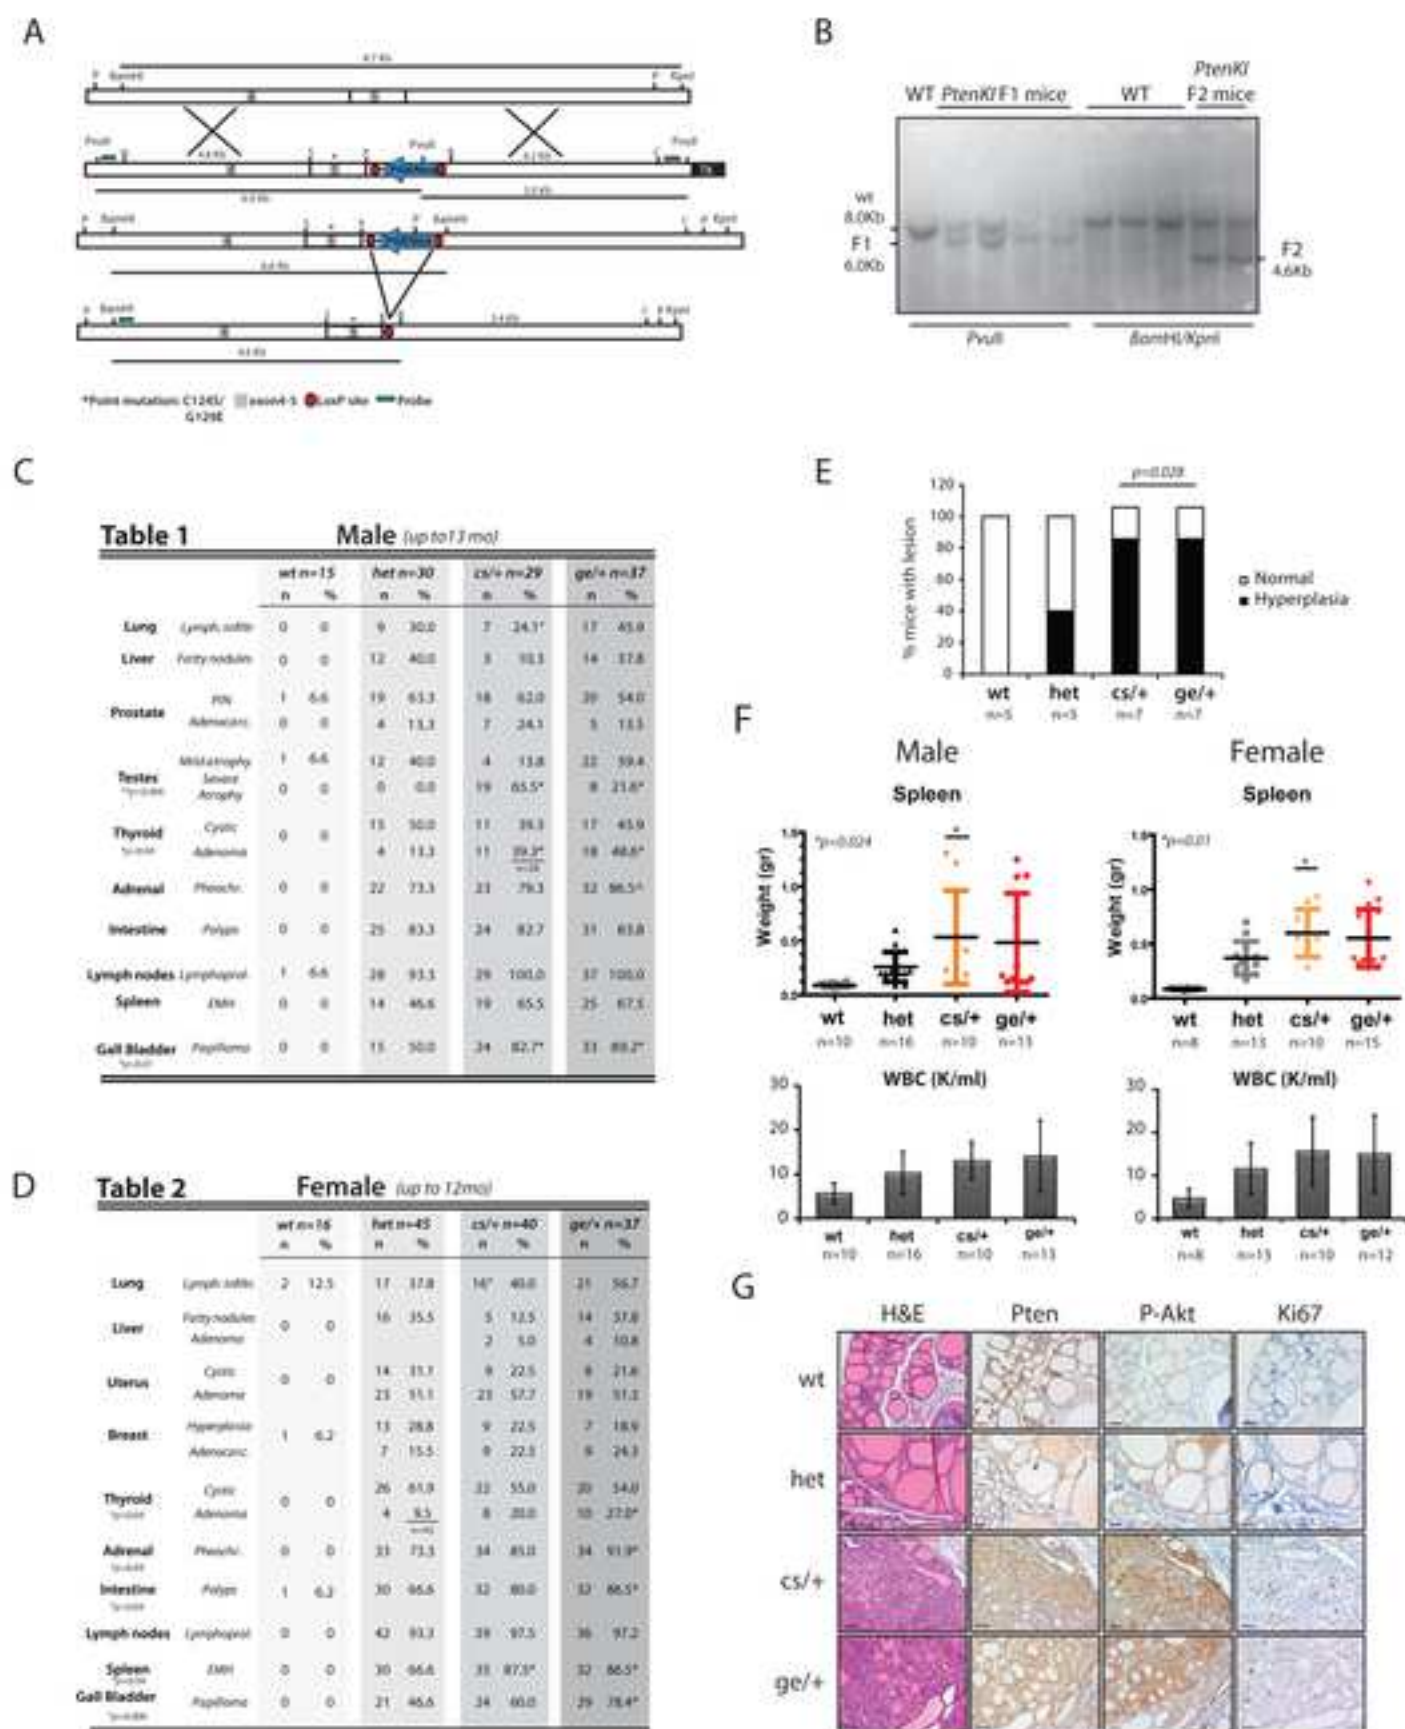



## Supplemental Figure S4 related to Figure 4

Papa et al.

A

|                           | n=18 | expected | observed |
|---------------------------|------|----------|----------|
| <i>cs/+</i> X <i>cs/+</i> |      |          |          |
| wt                        |      | 25%      | 28%      |
| CS/+                      |      | 50%      | 72%      |
| CS/CS                     |      | 25%      | 0        |

B

|                           | n=10 | expected | observed |
|---------------------------|------|----------|----------|
| <i>ge/+</i> X <i>ge/+</i> |      |          |          |
| wt                        |      | 25%      | 50%      |
| GE/+                      |      | 50%      | 50%      |
| GE/GE                     |      | 25%      | 0        |

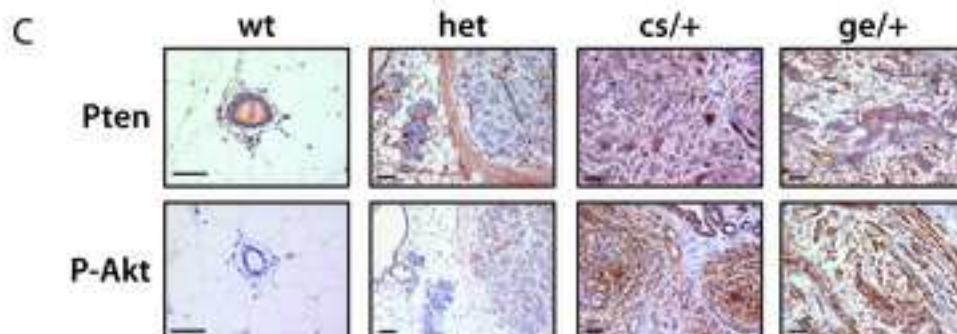

D

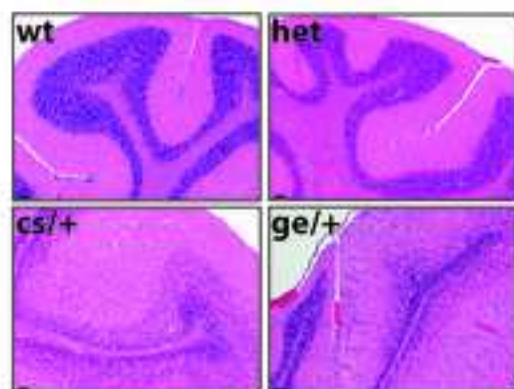

E

|         | wt n=10 |     | het n=25 |    | cs/+ n=27 |    | ge/+ n=40 |    |
|---------|---------|-----|----------|----|-----------|----|-----------|----|
|         | n       | %   | n        | %  | n         | %  | n         | %  |
| Normal  | 10      | 100 | 8        | 32 | 12        | 44 | 30        | 75 |
| Adenoma | 0       | 0   | 17***    | 68 | 15*       | 56 | 10        | 25 |

\*\*\*p=0.0001    \*p=0.02

G

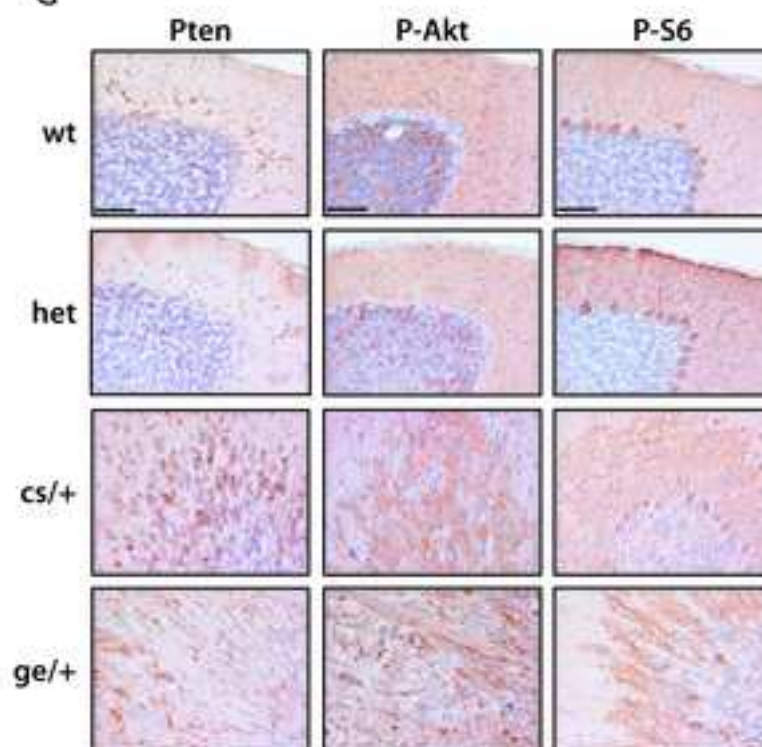

F

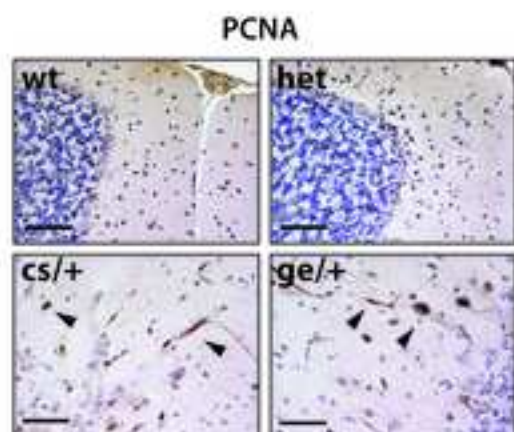

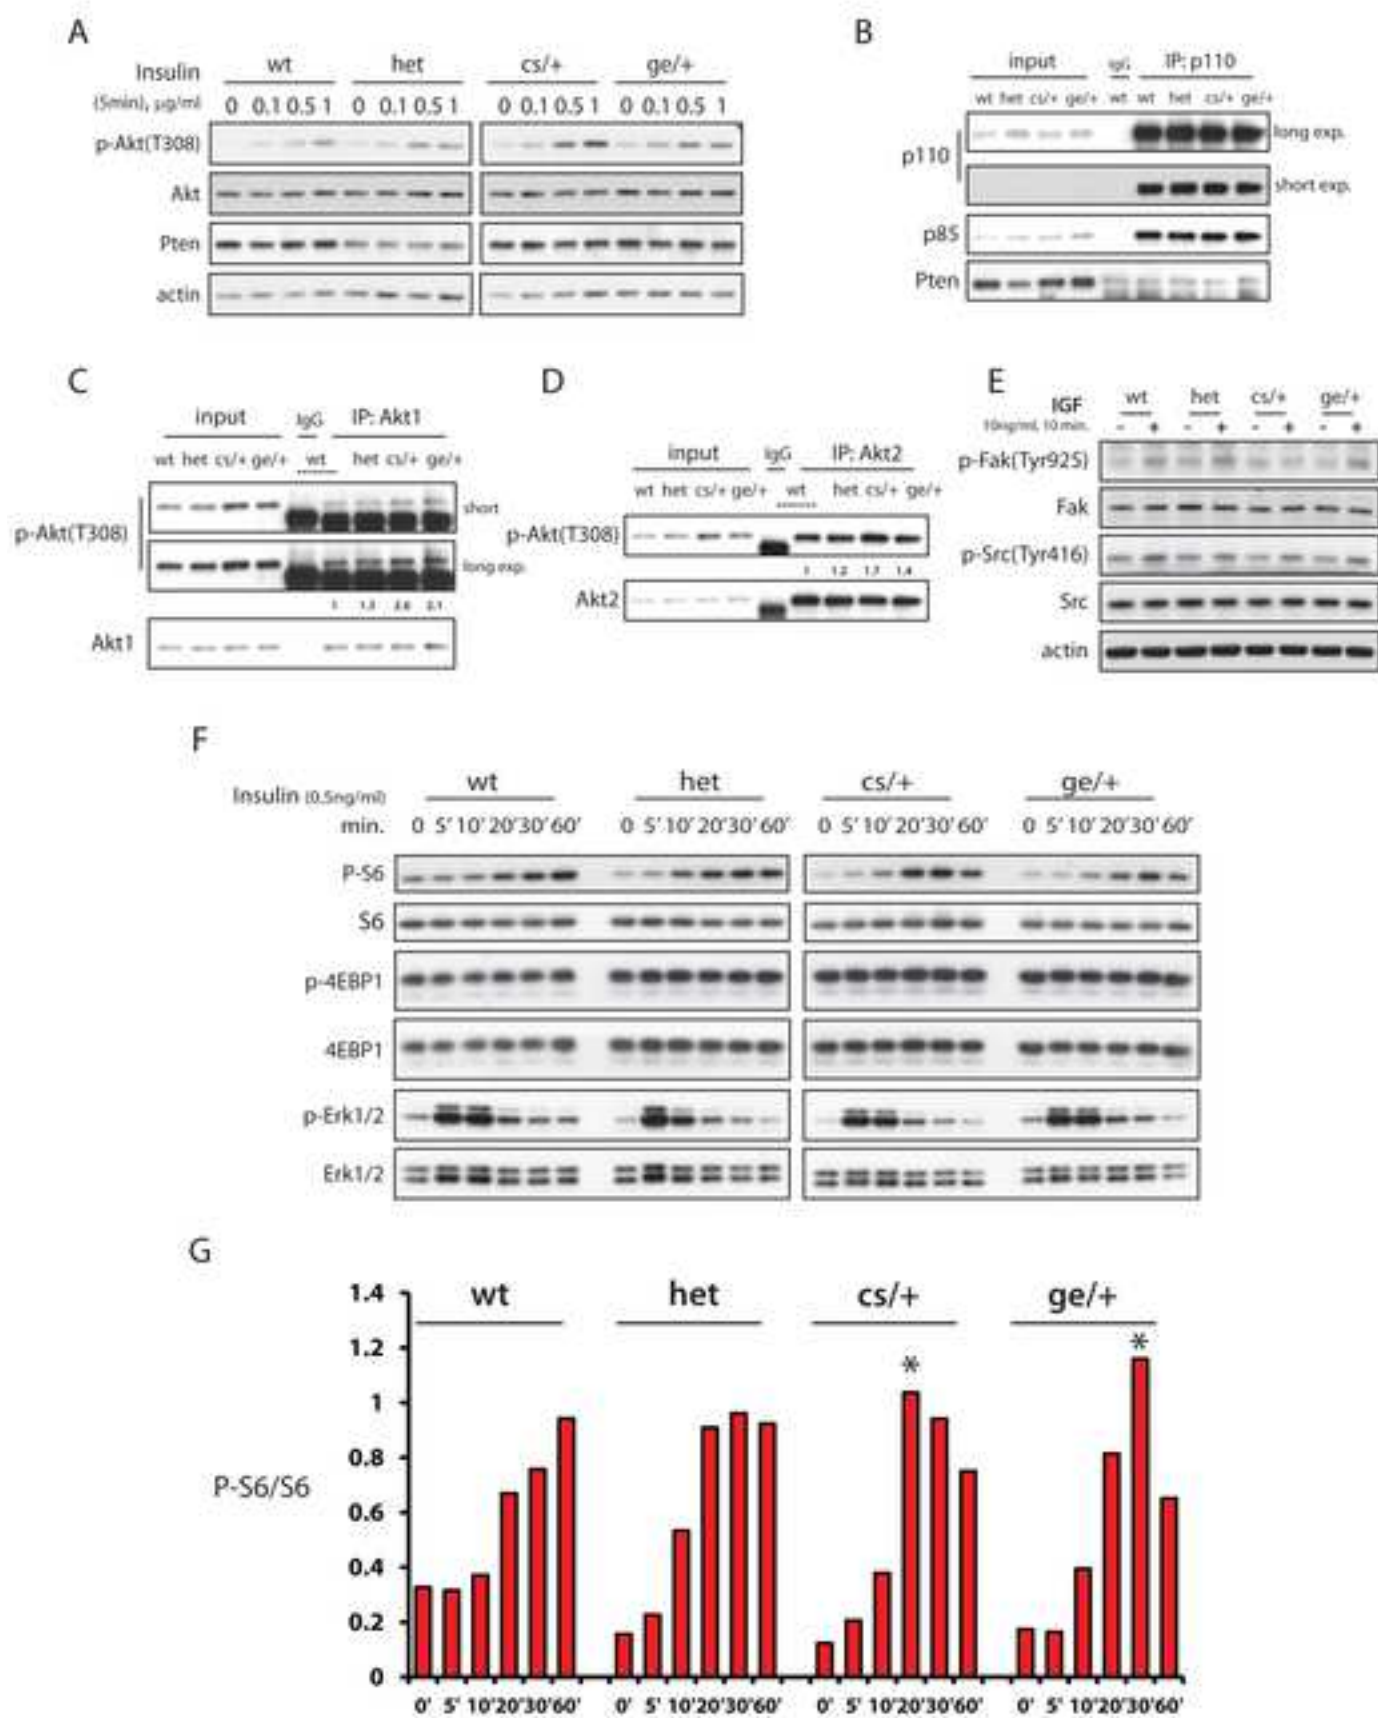

## Supplemental Figure S6 related to Figure 6

Papa et al.

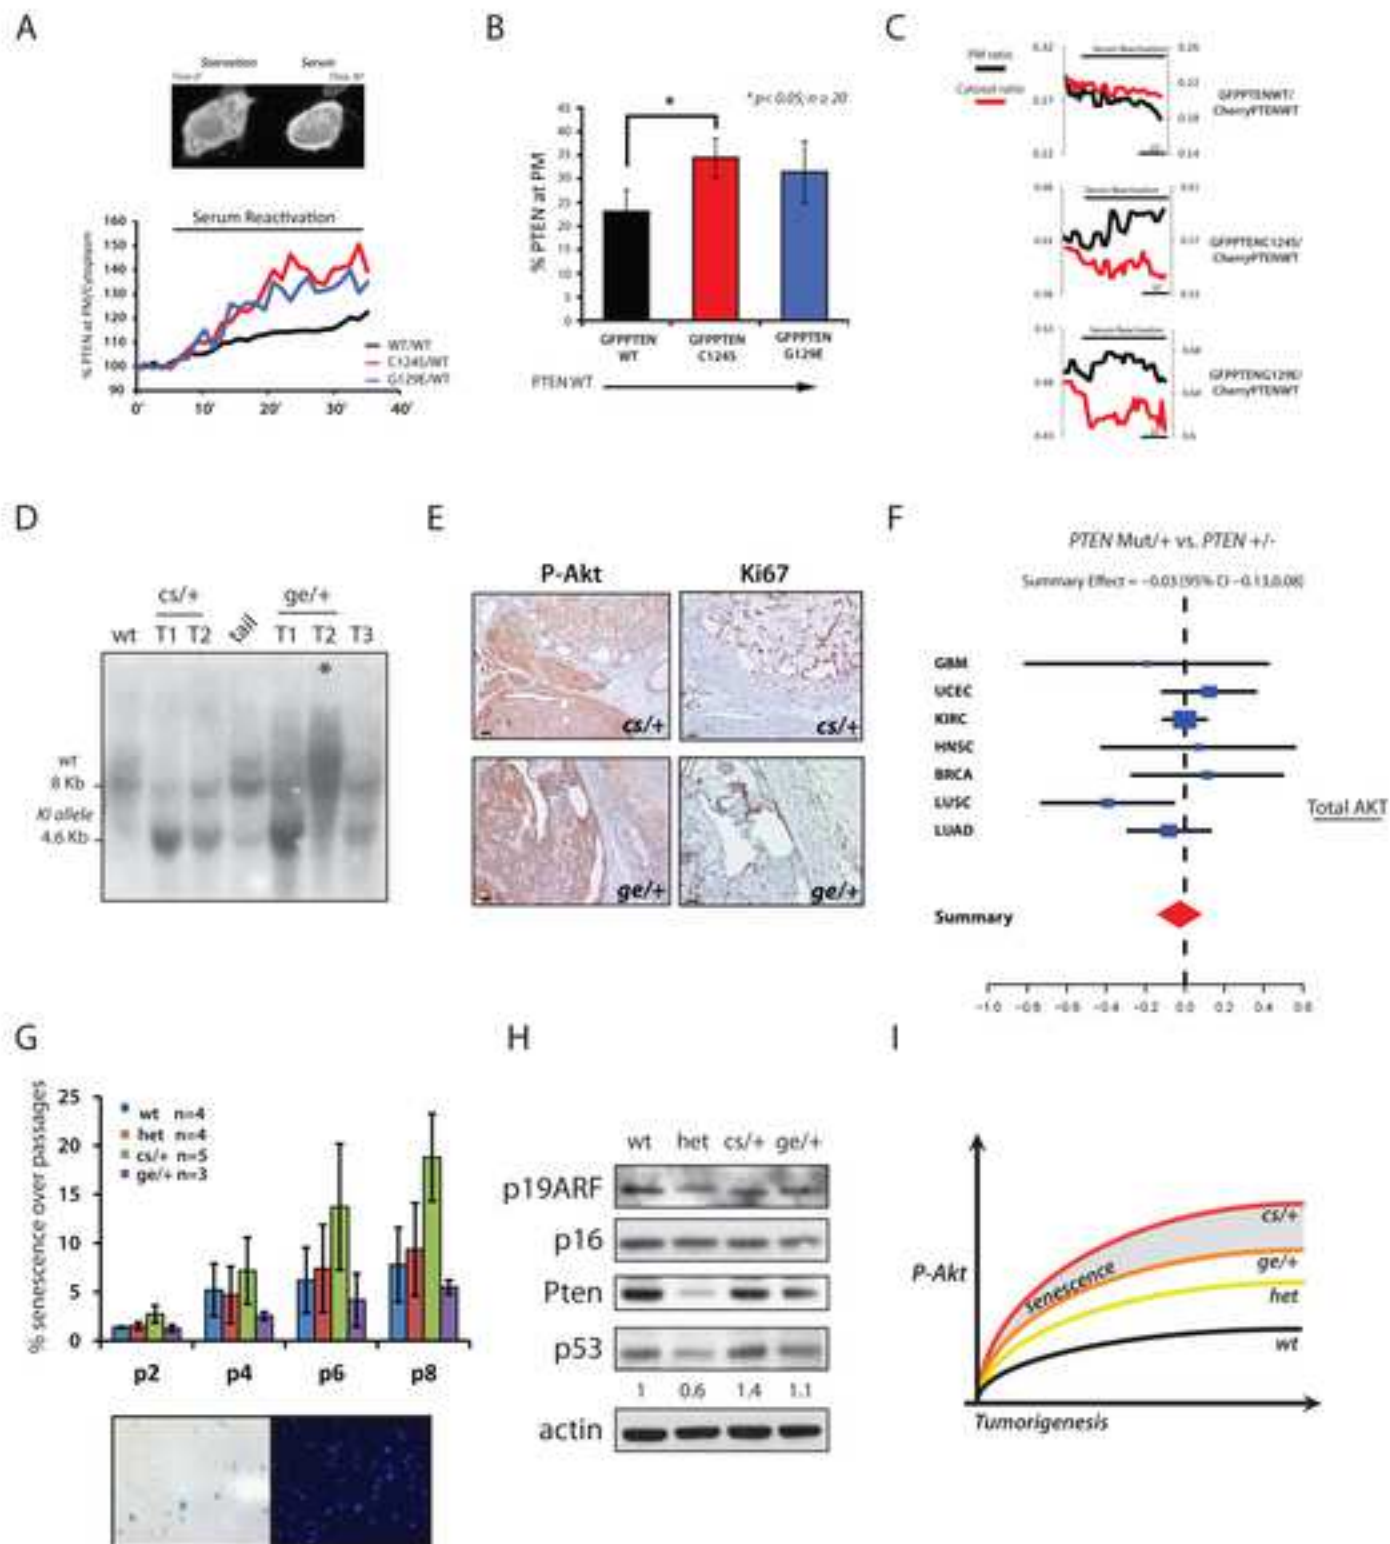

## Supplemental Figure S7 related to Figure 7

Papa et al.

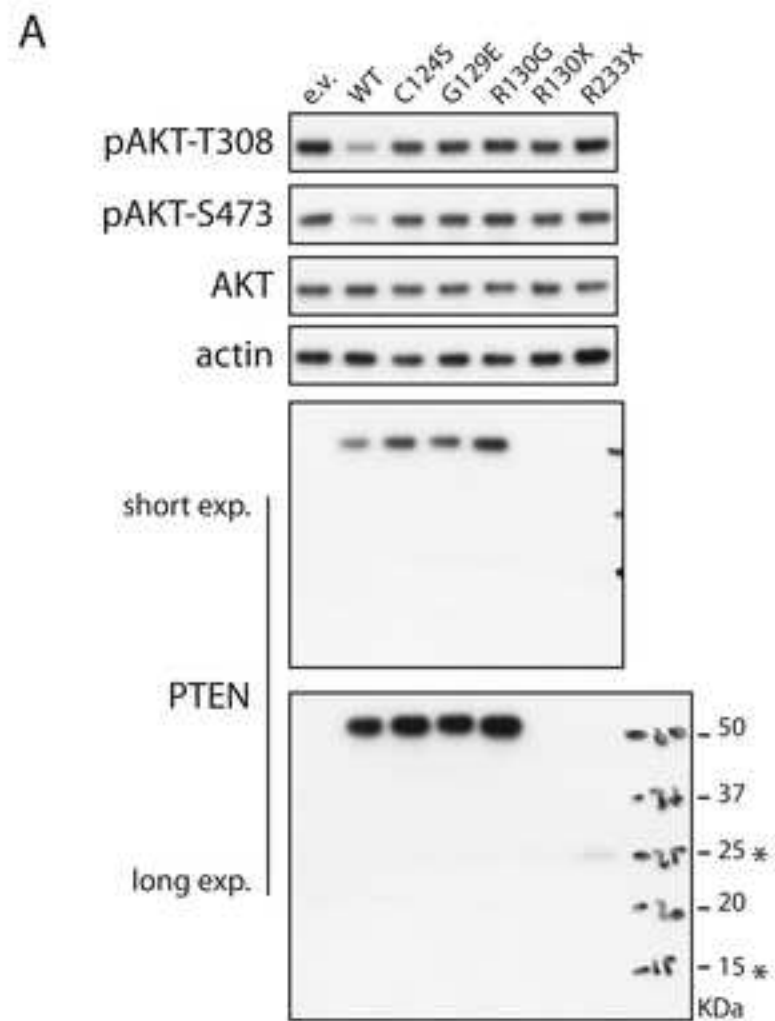

Supplement: NIHMS580403-supplement-02.pdf [file NIHMS580403-supplement-02.pdf]
